CORRECTION

## Correction: The impact of COVID-19 on sexual risk behaviour for HIV acquisition in east Zimbabwe: An observational study

Rebekah Morris, Simon Gregson, Rufurwokuda Maswera, Louisa Moorhouse, Tawanda Dadirai, Phyllis Mandizvidza, Brian Moyo, Owen Mugurungi, Constance Nyamukapa

There are errors in the Data Availability statement. The correct statement is: Due to the sensitive nature of data collected, including information on HIV status, treatment and sexual risk behaviour, the Manicaland Centre for Public Health Research does not make full analysis datasets publicly available. Summary datasets of household and background sociodemographic individual questionnaire data, covering rounds 1–8 (1998–2021), are publicly available for download via the Manicaland Centre for Public Health Research website here - <http://www.manicalandhivproject.org/data-access.html>. Quantitative data used for analyses produced by the Manicaland Centre for Public Health Research are available on request following completion of a data access request form here - <http://www.manicalandhivproject.org/data-access.html>. Additionally, summary HIV incidence and mortality data spanning rounds 1–6 (1998–2013), created in collaboration with the ALPHA Network are available via the Data-First Repository here - <https://www.datafirst.uct.ac.za/dataportal/index.php/catalog/ALPHA/about>.

In [Table 1](#), Section A for Males, Professional or Managerial under Employment, the p-value should be '0.002' instead of '0.00.'. Please see the correct [Table 1](#) here.

In [Fig 2](#), there is a minor error in the placement of an asterisk and the relevant footnote is missing. Please see the correct [Fig 2](#) here.

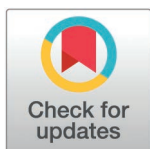

### OPEN ACCESS

**Citation:** Morris R, Gregson S, Maswera R, Moorhouse L, Dadirai T, Mandizvidza P, et al. (2025) Correction: The impact of COVID-19 on sexual risk behaviour for HIV acquisition in east Zimbabwe: An observational study. PLOS Glob Public Health 5(7): e0004970. <https://doi.org/10.1371/journal.pgph.0004970>

**Published:** July 22, 2025

**Copyright:** © 2025 Morris et al. This is an open access article distributed under the terms of the [Creative Commons Attribution License](#), which permits unrestricted use, distribution, and reproduction in any medium, provided the original author and source are credited.

**Table 1. Demographic characteristics of HIV negative adults aged 15-54 in Manicaland, prior to and during the Covid-19 pandemic.**

|                       | B) Females               |                  |                  |                 |                  |                  |                          |      |                  |                  |                  |       |                  |                  |                  |      |
|-----------------------|--------------------------|------------------|------------------|-----------------|------------------|------------------|--------------------------|------|------------------|------------------|------------------|-------|------------------|------------------|------------------|------|
|                       | A) Males                 |                  |                  |                 |                  |                  | Females                  |      |                  |                  |                  |       |                  |                  |                  |      |
|                       | Cross-sectional analysis |                  |                  | Cohort analysis |                  |                  | Cross-sectional analysis |      |                  | Cohort analysis  |                  |       |                  |                  |                  |      |
|                       | Pre-Covid                | During Covid     | AOR† (95%CI)     | p               | Pre-Covid        | During Covid     | AOR† (95%CI)             | p    | Pre-Covid        | During Covid     | AOR† (95%CI)     | p     | Pre-Covid        | During Covid     | AOR† (95%CI)     | p    |
|                       | % (95%CI)*               | % (95%CI)        |                  |                 | % (95%CI)        | % (95%CI)*       | % (95%CI)                |      | % (95%CI)        | % (95%CI)        |                  |       | % (95%CI)        | % (95%CI)        |                  |      |
|                       | N=3181                   | N=2773           |                  |                 | N=1171           | N=1171           |                          |      | N=4135           | N=3541           |                  |       | N=1997           | N=1997           |                  |      |
| <b>15-54yrs</b>       |                          |                  |                  |                 |                  |                  |                          |      |                  |                  |                  |       |                  |                  |                  |      |
| <b>Age Group</b>      |                          |                  |                  |                 |                  |                  |                          |      |                  |                  |                  |       |                  |                  |                  |      |
| 15-19                 | 26.4 (25.0-27.9)         | 25.8 (24.2-27.5) |                  |                 | 25.8 (23.4-28.4) | 17.8 (15.7-20.1) |                          |      | 21.5 (20.4-22.7) | 20.7 (19.4-22.1) |                  |       | 15.7 (14.2-17.4) | 10.6 (9.34-12.0) |                  |      |
| 20-24                 | 17.6 (16.4-18.9)         | 16.1 (14.8-17.5) |                  |                 | 12.7 (10.9-14.8) | 15.5 (13.6-17.7) |                          |      | 18.8 (17.7-19.9) | 15.9 (14.7-17.1) |                  |       | 14.6 (13.1-16.2) | 12.8 (11.4-14.3) |                  |      |
| 25-29                 | 11.7 (10.7-12.8)         | 12.3 (11.1-13.5) |                  |                 | 9.74 (8.16-11.6) | 10.8 (9.19-12.8) |                          |      | 13.8 (12.7-15.0) | 14.5 (13.4-15.7) |                  |       | 13.8 (12.3-15.4) | 15.2 (13.7-16.8) |                  |      |
| 30-34                 | 12.3 (11.1-13.7)         | 10.4 (9.34-11.6) |                  |                 | 11.5 (9.82-13.5) | 10.6 (8.95-12.5) |                          |      | 13.7 (12.6-14.9) | 12.5 (11.4-13.6) |                  |       | 15.7 (14.1-17.3) | 13.9 (12.5-15.5) |                  |      |
| 35-44                 | 20.2 (18.7-21.8)         | 21.8 (20.3-23.4) |                  |                 | 24.4 (22.0-27.0) | 25.7 (23.3-28.3) |                          |      | 20.2 (18.9-21.5) | 22.7 (21.3-24.1) |                  |       | 25.2 (23.3-27.1) | 27.6 (25.7-29.6) |                  |      |
| 45-54                 | 11.8 (10.6-13.1)         | 13.6 (12.3-14.9) |                  |                 | 15.8 (13.8-18.0) | 16.5 (14.5-18.7) |                          |      | 12.0 (10.9-13.1) | 13.7 (12.6-14.9) |                  |       | 15.0 (13.5-16.7) | 16.4 (14.9-18.1) |                  |      |
| <b>55+</b>            |                          |                  |                  |                 |                  | 3.07 (2.22-4.23) |                          |      |                  |                  |                  |       |                  | 3.51 (2.78-4.41) |                  |      |
| <b>Site Type†</b>     |                          |                  |                  |                 |                  |                  |                          |      |                  |                  |                  |       |                  |                  |                  |      |
| Urban                 | 14.5 (13.3-15.7)         | 20.6 (19.1-22.1) | 1.53 (1.33-1.75) | <0.001          | 14.8 (12.9-16.9) | 14.8 (12.9-16.9) | 0.99 (0.78-1.25)         | 0.93 | 18.7 (17.6-20.0) | 19.5 (18.2-20.8) | 1.06 (0.95-1.19) | 0.32  | 15.6 (14.0-17.2) | 15.6 (14.0-17.2) | 1.04 (0.87-1.23) | 0.69 |
| Periurban             | 23.1 (21.6-24.6)         | 27.8 (26.1-29.5) | 1.28 (1.14-1.44) | <0.001          | 25.7 (23.3-28.3) | 25.7 (23.3-28.3) | 1.03 (0.85-1.24)         | 0.75 | 28.1 (26.7-29.5) | 30.3 (28.8-31.9) | 1.12 (1.01-1.24) | 0.03  | 30.2 (28.3-32.3) | 30.2 (28.3-32.3) | 1.01 (0.88-1.16) | 0.84 |
| Estates               | 32.6 (30.9-34.3)         | 24.8 (23.3-26.5) | 0.68 (0.61-0.77) | <0.001          | 30.3 (27.7-33.0) | 30.3 (27.7-33.0) | 1.00 (0.83-1.20)         | 0.99 | 21.9 (20.7-23.3) | 21.2 (19.9-22.6) | 0.95 (0.85-1.06) | 0.34  | 21.1 (19.4-23.0) | 21.1 (19.4-23.0) | 0.98 (0.84-1.14) | 0.78 |
| Rural                 | 29.9 (28.3-31.5)         | 26.8 (25.2-28.5) | 0.86 (0.76-0.96) | 0.01            | 29.2 (26.7-31.9) | 29.2 (26.7-31.9) | 0.98 (0.82-1.17)         | 0.81 | 31.2 (29.8-32.7) | 29.0 (27.5-30.5) | 0.89 (0.81-0.99) | 0.03  | 33.0 (31.0-35.1) | 33.0 (31.0-35.1) | 0.98 (0.86-1.12) | 0.79 |
| <b>Marital Status</b> |                          |                  |                  |                 |                  |                  |                          |      |                  |                  |                  |       |                  |                  |                  |      |
| Never married         | 43.7 (42.0-45.5)         | 43.3 (41.5-45.2) | 1.08 (0.91-1.29) | 0.36            | 38.4 (35.7-41.3) | 33.7 (31.1-36.5) | 1.13 (0.83-1.55)         | 0.44 | 23.8 (22.6-25.1) | 23.9 (22.5-25.3) | 1.17 (1.02-1.35) | 0.03  | 17.7 (16.1-19.4) | 15.2 (13.7-16.9) | 1.34 (1.05-1.71) | 0.02 |
| Married/cohabiting    | 52.5 (50.8-54.3)         | 53.4 (51.5-55.3) | 0.97 (0.83-1.14) | 0.69            | 59.1 (56.2-61.9) | 62.9 (60.0-65.6) | 0.83 (0.63-1.10)         | 0.20 | 64.8 (63.3-66.2) | 63.0 (61.4-64.6) | 0.85 (0.76-0.95) | 0.003 | 71.6 (69.6-73.5) | 73.1 (71.1-75.0) | 0.92 (0.78-1.08) | 0.30 |

(Continued)

Table 1. (Continued)

|                                               | B)                      |                         |                         |        |                         |                         |                         |        |                     |                         |                         |        |                         |                         |                         |        |
|-----------------------------------------------|-------------------------|-------------------------|-------------------------|--------|-------------------------|-------------------------|-------------------------|--------|---------------------|-------------------------|-------------------------|--------|-------------------------|-------------------------|-------------------------|--------|
|                                               | A) Males                |                         |                         |        |                         | Females                 |                         |        |                     |                         |                         |        |                         |                         |                         |        |
| Divorced/<br>Separated                        | 3.51<br>(2.88-<br>4.28) | 2.92<br>(2.36-<br>3.62) | 0.86<br>(0.63-<br>1.17) | 0.34   | 2.22<br>(1.52-<br>3.24) | 3.07<br>(2.22-<br>4.23) | 1.29<br>(0.77-<br>2.17) | 0.33   | 8.58<br>(7.73-9.52) | 9.86<br>(8.92-<br>10.9) | 1.14<br>(0.97-<br>1.33) | 0.12   | 7.66<br>(6.57-<br>8.91) | 7.41<br>(6.34-<br>8.65) | 0.88<br>(0.69-<br>1.13) | 0.32   |
| Widowed                                       | 0.23<br>(0.10-<br>0.51) | 0.36<br>(0.19-<br>0.67) | 1.35<br>(0.48-<br>3.78) | 0.57   | 0.26<br>(0.08-<br>0.79) | 0.34<br>(0.13-<br>0.91) | 1.30<br>(0.29-<br>5.85) | 0.73   | 2.80<br>(2.30-3.40) | 3.28<br>(2.74-<br>3.92) | 1.10<br>(0.82-<br>1.46) | 0.53   | 3.05<br>(2.38-<br>3.91) | 4.26<br>(3.45-<br>5.24) | 1.04<br>(0.72-<br>1.51) | 0.83   |
| <b>Household<br/>Wealth Index<sup>s</sup></b> |                         |                         |                         |        |                         |                         |                         |        |                     |                         |                         |        |                         |                         |                         |        |
| Poorest                                       | 9.81<br>(8.79-<br>10.9) | 5.59<br>(4.80-<br>6.51) | 0.55<br>(0.45-<br>0.68) | <0.001 | 9.65<br>(8.08-<br>11.5) | 7.34<br>(5.98-<br>8.99) | 0.72<br>(0.53-<br>0.99) | 0.04   | 8.97<br>(8.12-9.90) | 6.70<br>(5.92-<br>7.57) | 0.74<br>(0.62-<br>0.88) | 0.001  | 9.51<br>(8.30-<br>10.9) | 8.17<br>(7.04-<br>9.45) | 0.84<br>(0.67-<br>1.06) | 0.15   |
| 2nd poorest                                   | 46.5<br>(44.8-<br>48.3) | 42.1<br>(40.3-<br>44.0) | 0.98<br>(0.88-<br>1.10) | 0.77   | 42.7<br>(39.9-<br>45.6) | 42.5<br>(39.7-<br>45.4) | 1.00<br>(0.84-<br>1.19) | 0.99   | 40.3<br>(38.8-41.9) | 41.4<br>(39.8-<br>43.1) | 1.11<br>(1.00-<br>1.22) | 0.04   | 41.5<br>(39.4-<br>43.7) | 42.9<br>(40.7-<br>45.1) | 1.06<br>(0.93-<br>1.22) | 0.38   |
| 3rd poorest                                   | 22.3<br>(20.8-<br>23.8) | 29.3<br>(27.7-<br>31.1) | 1.41<br>(1.25-<br>1.59) | <0.001 | 24.0<br>(21.6-<br>26.5) | 28.4<br>(25.9-<br>31.1) | 1.26<br>(1.04-<br>1.52) | 0.02   | 24.0<br>(22.7-25.4) | 28.1<br>(26.7-<br>29.6) | 1.22<br>(1.10-<br>1.36) | <0.001 | 24.3<br>(22.5-<br>26.2) | 26.2<br>(24.3-<br>28.1) | 1.11<br>(0.96-<br>1.28) | 0.17   |
| 4th poorest                                   | 20.1<br>(18.8-<br>21.6) | 22.2<br>(20.7-<br>23.8) | 0.90<br>(0.78-<br>1.03) | 0.12   | 22.1<br>(19.8-<br>24.6) | 20.9<br>(18.7-<br>23.3) | 0.91<br>(0.73-<br>1.13) | 0.40   | 25.0<br>(23.7-26.3) | 22.7<br>(21.4-<br>24.1) | 0.81<br>(0.72-<br>0.91) | <0.001 | 23.3<br>(21.5-<br>25.2) | 21.8<br>(20.0-<br>23.7) | 0.89<br>(0.76-<br>1.05) | 0.18   |
| Least poor                                    | 1.25<br>(0.91-<br>1.70) | 0.76<br>(0.49-<br>1.16) | 0.52<br>(0.30-<br>0.89) | 0.02   | 1.54<br>(0.97-<br>2.43) | 0.77<br>(0.40-<br>1.47) | 0.91<br>(0.73-<br>1.13) | 0.40   | 1.70<br>(1.34-2.15) | 1.02<br>(0.73-<br>1.41) | 0.58<br>(0.39-<br>0.88) | 0.01   | 1.40<br>(0.97-<br>2.02) | 1.00<br>(0.65-<br>1.55) | 0.74<br>(0.41-<br>1.32) | 0.31   |
| <b>Employment</b>                             |                         |                         |                         |        |                         |                         |                         |        |                     |                         |                         |        |                         |                         |                         |        |
| Professional or<br>managerial                 | 4.03<br>(3.35-<br>4.85) | 6.31<br>(5.46-<br>7.28) | 1.48<br>(1.15-<br>1.91) | 0.002  | 4.95<br>(3.85-<br>6.36) | 6.40<br>(5.14-<br>7.96) | 1.20<br>(0.83-<br>1.73) | 0.33   | 3.63<br>(3.06-4.30) | 4.69<br>(4.04-<br>5.44) | 1.21<br>(0.95-<br>1.54) | 0.12   | 3.61<br>(2.87-<br>4.52) | 4.61<br>(3.77-<br>5.62) | 1.20<br>(0.87-<br>1.66) | 0.27   |
| Self-employed:<br>small business              | 1.17<br>(0.83-<br>1.63) | 1.33<br>(0.97-<br>1.84) | 0.96<br>(0.60-<br>1.55) | 0.87   | 1.20<br>(0.71-<br>2.01) | 1.28<br>(0.77-<br>2.11) | 1.03<br>(0.49-<br>2.15) | 0.95   | 0.46<br>(0.29-0.76) | 1.47<br>(1.12-<br>1.92) | 3.36<br>(1.90-<br>5.93) | <0.001 | 0.60<br>(0.34-<br>1.06) | 1.60<br>(1.14-<br>2.26) | 2.48<br>(1.26-<br>4.88) | 0.01   |
| Skilled labour                                | 7.40<br>(6.48-<br>8.43) | 14.3<br>(13.1-<br>15.7) | 2.42<br>(2.01-<br>2.92) | <0.001 | 8.28<br>(6.83-<br>10.0) | 15.8<br>(13.8-<br>18.0) | 1.96<br>(1.49-<br>2.58) | <0.001 | 2.34<br>(1.90-2.89) | 4.52<br>(3.88-<br>5.25) | 1.97<br>(1.50-<br>2.58) | <0.001 | 2.40<br>(1.82-<br>3.18) | 3.76<br>(3.00-<br>4.69) | 1.47<br>(1.01-<br>2.15) | 0.04   |
| Manual/<br>unskilled<br>labour                | 18.8<br>(17.5-<br>20.3) | 15.5<br>(14.2-<br>16.9) | 0.99<br>(0.84-<br>1.16) | 0.86   | 13.8<br>(12.0-<br>15.9) | 17.6<br>(15.5-<br>19.9) | 1.32<br>(1.03-<br>1.69) | 0.03   | 4.42<br>(3.80-5.13) | 7.79<br>(6.96-<br>8.72) | 1.90<br>(1.55-<br>2.34) | <0.001 | 4.36<br>(3.54-<br>5.35) | 8.21<br>(7.09-<br>9.50) | 2.00<br>(1.51-<br>2.65) | <0.001 |
| Informal<br>employment                        | 15.0<br>(13.7-<br>16.3) | 14.1<br>(12.8-<br>15.4) | 0.81<br>(0.69-<br>0.94) | 0.01   | 17.0<br>(14.9-<br>19.3) | 16.0<br>(14.0-<br>18.2) | 0.84<br>(0.67-<br>1.06) | 0.14   | 13.7<br>(12.6-14.8) | 18.8<br>(17.6-<br>20.1) | 1.41<br>(1.24-<br>1.60) | <0.001 | 15.9<br>(14.4-<br>17.6) | 23.6<br>(21.8-<br>25.6) | 1.56<br>(1.33-<br>1.84) | <0.001 |
| Student                                       | 22.2<br>(20.8-<br>23.6) | 19.8<br>(18.4-<br>21.4) | 0.77<br>(0.64-<br>0.92) | 0.004  | 24.2<br>(21.8-<br>26.7) | 11.7<br>(10.0-<br>13.7) | 0.32<br>(0.23-<br>0.45) | <0.001 | 15.2<br>(14.3-16.3) | 15.3<br>(14.2-<br>16.6) | 1.13<br>(0.96-<br>1.32) | 0.15   | 12.7<br>(11.3-<br>14.2) | 8.06<br>(6.95-<br>9.34) | 0.78<br>(0.58-<br>1.04) | 0.09   |
| Unemployed                                    | 24.8<br>(23.3-<br>26.4) | 28.6<br>(27.0-<br>30.3) | 1.20<br>(1.06-<br>1.35) | 0.004  | 23.7<br>(21.3-<br>26.2) | 31.3<br>(28.7-<br>34.0) | 1.44<br>(1.18-<br>1.74) | <0.001 | 52.5<br>(51.0-54.1) | 47.4<br>(45.7-<br>49.0) | 0.82<br>(0.75-<br>0.90) | <0.001 | 52.8<br>(50.6-<br>55.0) | 50.1<br>(47.9-<br>52.3) | 0.84<br>(0.73-<br>0.95) | 0.01   |
| Other:<br>unspecified <sup>l</sup>            | 6.61<br>(5.76-<br>7.57) |                         |                         |        | 6.92<br>(5.60-<br>8.52) |                         |                         |        | 7.64<br>(6.84-8.53) |                         |                         |        | 7.61<br>(6.53-<br>8.86) |                         |                         |        |

(Continued)

Table 1. (Continued)

|                                                | B) Females          |                     |                     |        |                     |                     |                     |        |                     |                     |                     |      |                     |                     |                      |      |  |  |  |  |
|------------------------------------------------|---------------------|---------------------|---------------------|--------|---------------------|---------------------|---------------------|--------|---------------------|---------------------|---------------------|------|---------------------|---------------------|----------------------|------|--|--|--|--|
|                                                | A) Males            |                     |                     |        |                     | B) Females          |                     |        |                     |                     |                     |      |                     |                     |                      |      |  |  |  |  |
| <b>Alcohol/Drugs</b>                           |                     |                     |                     |        |                     |                     |                     |        |                     |                     |                     |      |                     |                     |                      |      |  |  |  |  |
| Drank alcohol in the past year                 | 26.9<br>(25.3-28.5) | 21.7<br>(20.2-23.2) | 0.73<br>(0.64-0.84) | <0.001 | 27.3<br>(24.8-30.0) | 26.5<br>(24.0-29.1) | 0.86<br>(0.71-1.05) | 0.13   | 2.01<br>(1.62-2.50) | 2.40<br>(1.94-2.96) | 1.19<br>(0.87-1.62) | 0.27 | 2.10<br>(1.56-2.83) | 1.85<br>(1.35-2.55) | 0.84<br>(0.53-1.33)  | 0.46 |  |  |  |  |
| Visited bar, beerhall or shebeen in past month | 31.0<br>(29.3-32.7) | 16.9<br>(15.6-18.4) | 0.44<br>(0.39-0.51) | <0.001 | 31.4<br>(28.8-34.1) | 21.4<br>(19.1-23.9) | 0.52<br>(0.43-0.63) | <0.001 | 0.62<br>(0.42-0.91) | 0.62<br>(0.41-0.94) | 0.97<br>(0.55-1.71) | 0.91 | 0.40<br>(0.20-0.80) | 0.60<br>(0.34-1.06) | 1.42<br>(0.57-3.55)  | 0.45 |  |  |  |  |
| Using drugs for pleasure                       | 4.78<br>(4.08-5.61) | 2.92<br>(2.36-3.62) | 0.60<br>(0.45-0.79) | <0.001 | 3.76<br>(2.81-5.01) | 3.67<br>(2.73-4.92) | 0.90<br>(0.58-1.39) | 0.63   | 0.19<br>(0.10-0.39) | 0.34<br>(0.19-0.60) | 1.81<br>(0.73-4.48) | 0.20 | 0.05<br>(0.01-0.35) | 0.30<br>(0.13-0.67) | 6.50<br>(0.78-54.27) | 0.08 |  |  |  |  |
| <b>15-19yrs</b>                                | <b>N=986</b>        | <b>N=716</b>        |                     |        | <b>N=302</b>        | <b>N=302</b>        |                     |        | <b>N=1112</b>       | <b>N=734</b>        |                     |      | <b>N=314</b>        | <b>N=314</b>        |                      |      |  |  |  |  |
| <b>Currently Enrolled in Education</b>         | 73.2<br>(70.4-75.9) | 64.0<br>(60.4-67.4) | 0.64<br>(0.50-0.82) | <0.001 | 84.4<br>(79.9-88.1) | 37.7<br>(32.4-43.4) | 0.33<br>(0.21-0.52) | <0.001 | 57.7<br>(54.8-60.6) | 57.1<br>(53.5-60.6) | 1.06<br>(0.84-1.33) | 0.64 | 69.4<br>(64.1-74.3) | 36.0<br>(30.8-41.5) | 0.90<br>(0.59-1.37)  | 0.62 |  |  |  |  |

\* In the cross-sectional analysis of the pre-covid survey, proportions are weighted to account for age bias in selection.

† Odds ratios are adjusted for 5 year age group and site type. For variables limited to 15–19 year olds odds ratios are adjusted for site type and age in years.

‡ Note that no specific procedures were followed to identify individuals moving to different study site between the survey rounds.

§ Household wealth was estimated for each individual by assessing asset ownership within their household and attributing a score as described by Schur et al [19]. Each asset variable was transformed into scores between 0 and 1. The values of each asset variable were then summed and divided by the total number of assets giving an overall score between 0 and 1. Equally spaced cut offs (0,0.2, 0.4, 0.6, 0.8) were used to categorise the overall wealth of a household into five groups.

|| These individuals answered 'other' for their category of employment but then did not specify in the follow up question so they could not be recoded to any of the other categories.

<https://doi.org/10.1371/journal.pgph.0004970.t001>

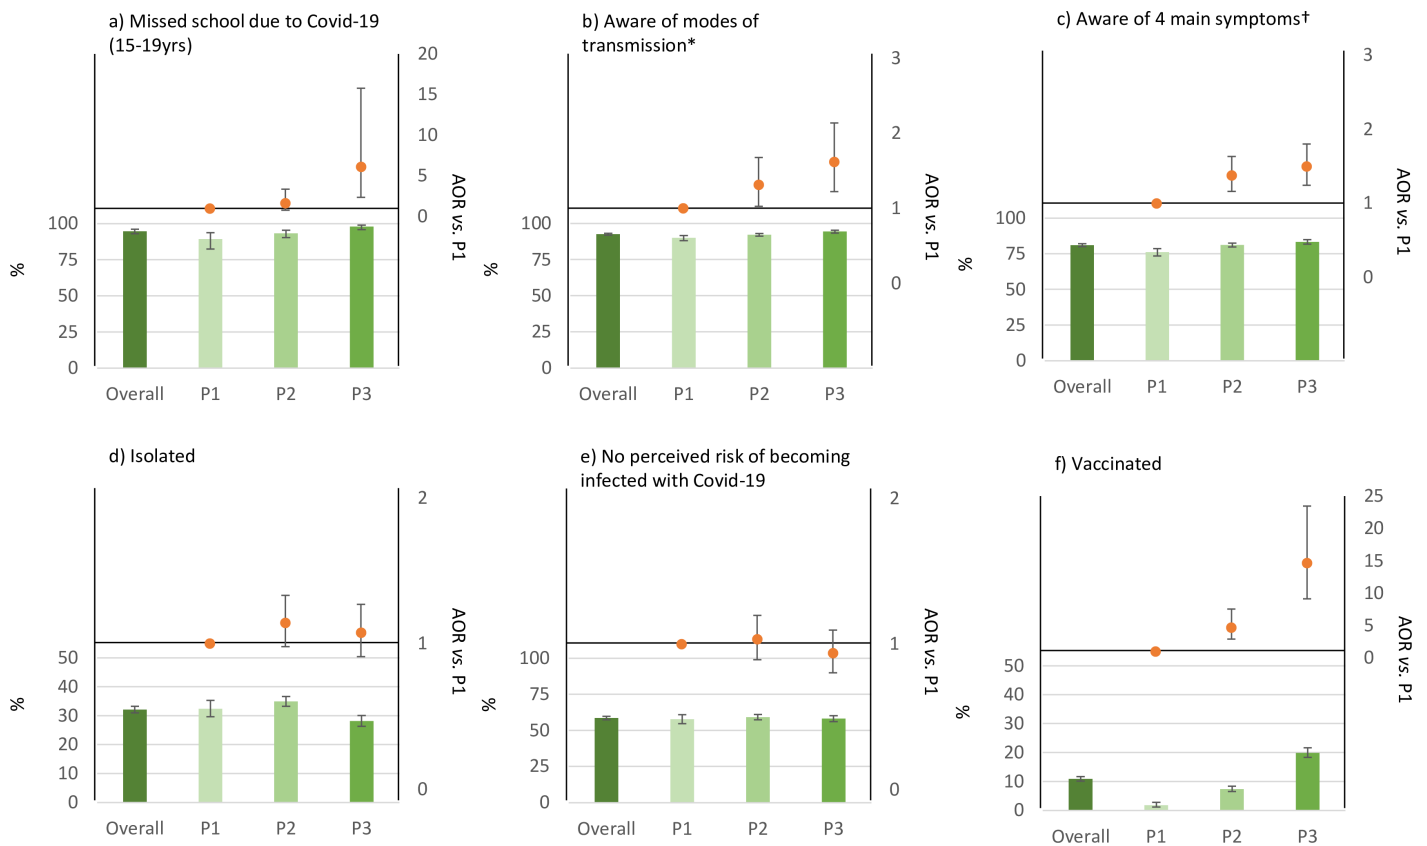

**Fig 2. Population effects and responses to the Covid-19 pandemic amongst HIV negative adults aged 15–54 in Manicaland during three periods of the Covid-19 pandemic from February to July 2020 (P1: February-March 2020, P2: April-May 2020, P3: June-July 2020).** \* Modes of transmission included: droplets from coughing or sneezing, touching eyes/ears/nose or mouth when unclean and touching surfaces. † Fever, cough, loss of smell, and loss of sense of taste.

<https://doi.org/10.1371/journal.pgph.0004970.g002>

## Reference

1. Morris R, Gregson S, Maswera R, Moorhouse L, Dadirai T, Mandizvidza P, et al. The impact of COVID-19 on sexual risk behaviour for HIV acquisition in east Zimbabwe: An observational study. *PLOS Glob Public Health*. 2024;4(7):e0003194. <https://doi.org/10.1371/journal.pgph.0003194> PMID: [39018312](https://pubmed.ncbi.nlm.nih.gov/39018312/)
